# Supplementary material for: Humanized mice mount specific adaptive and innate immune responses to EBV and TSST-1
Source: Springer Nature journal article supplement (doi:10.1038/nm1431), 2006-10-22
Supplement: 41591_2006_BFnm1431_MOESM1_ESM.pdf [file 41591_2006_BFnm1431_MOESM1_ESM.pdf]

# Supplementary Figure 1

BLT liver

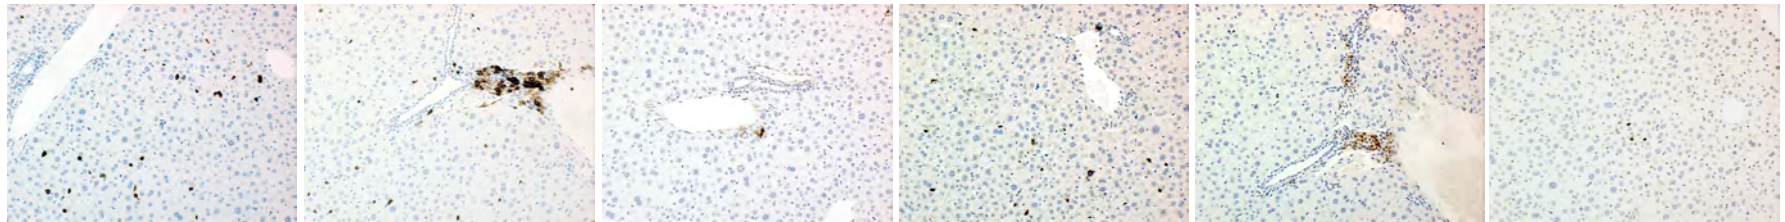

CD45

CD68

CD83

CD20

CD4

CD8

Human liver

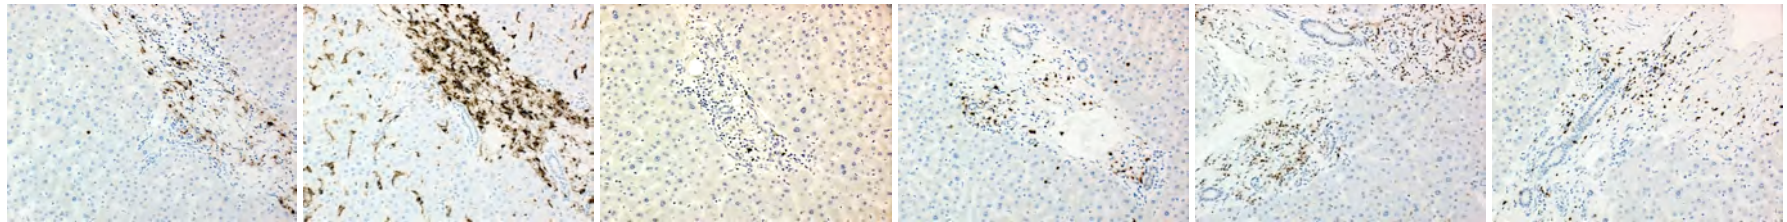

CD45

CD68

CD83

CD20

CD4

CD8

**Supplementary Figure 1.** Immunohistological staining for human CD45<sup>+</sup> cells and lineage specific hematopoietic markers in BLT liver compared to human liver (100x magnification).
