# Supplementary material for: Humanized mice mount specific adaptive and innate immune responses to EBV and TSST-1
Source: Springer Nature journal article supplement (doi:10.1038/nm1431), 2006-10-22
Supplement: 41591_2006_BFnm1431_MOESM2_ESM.pdf [file 41591_2006_BFnm1431_MOESM2_ESM.pdf]

## Supplementary Figure 2

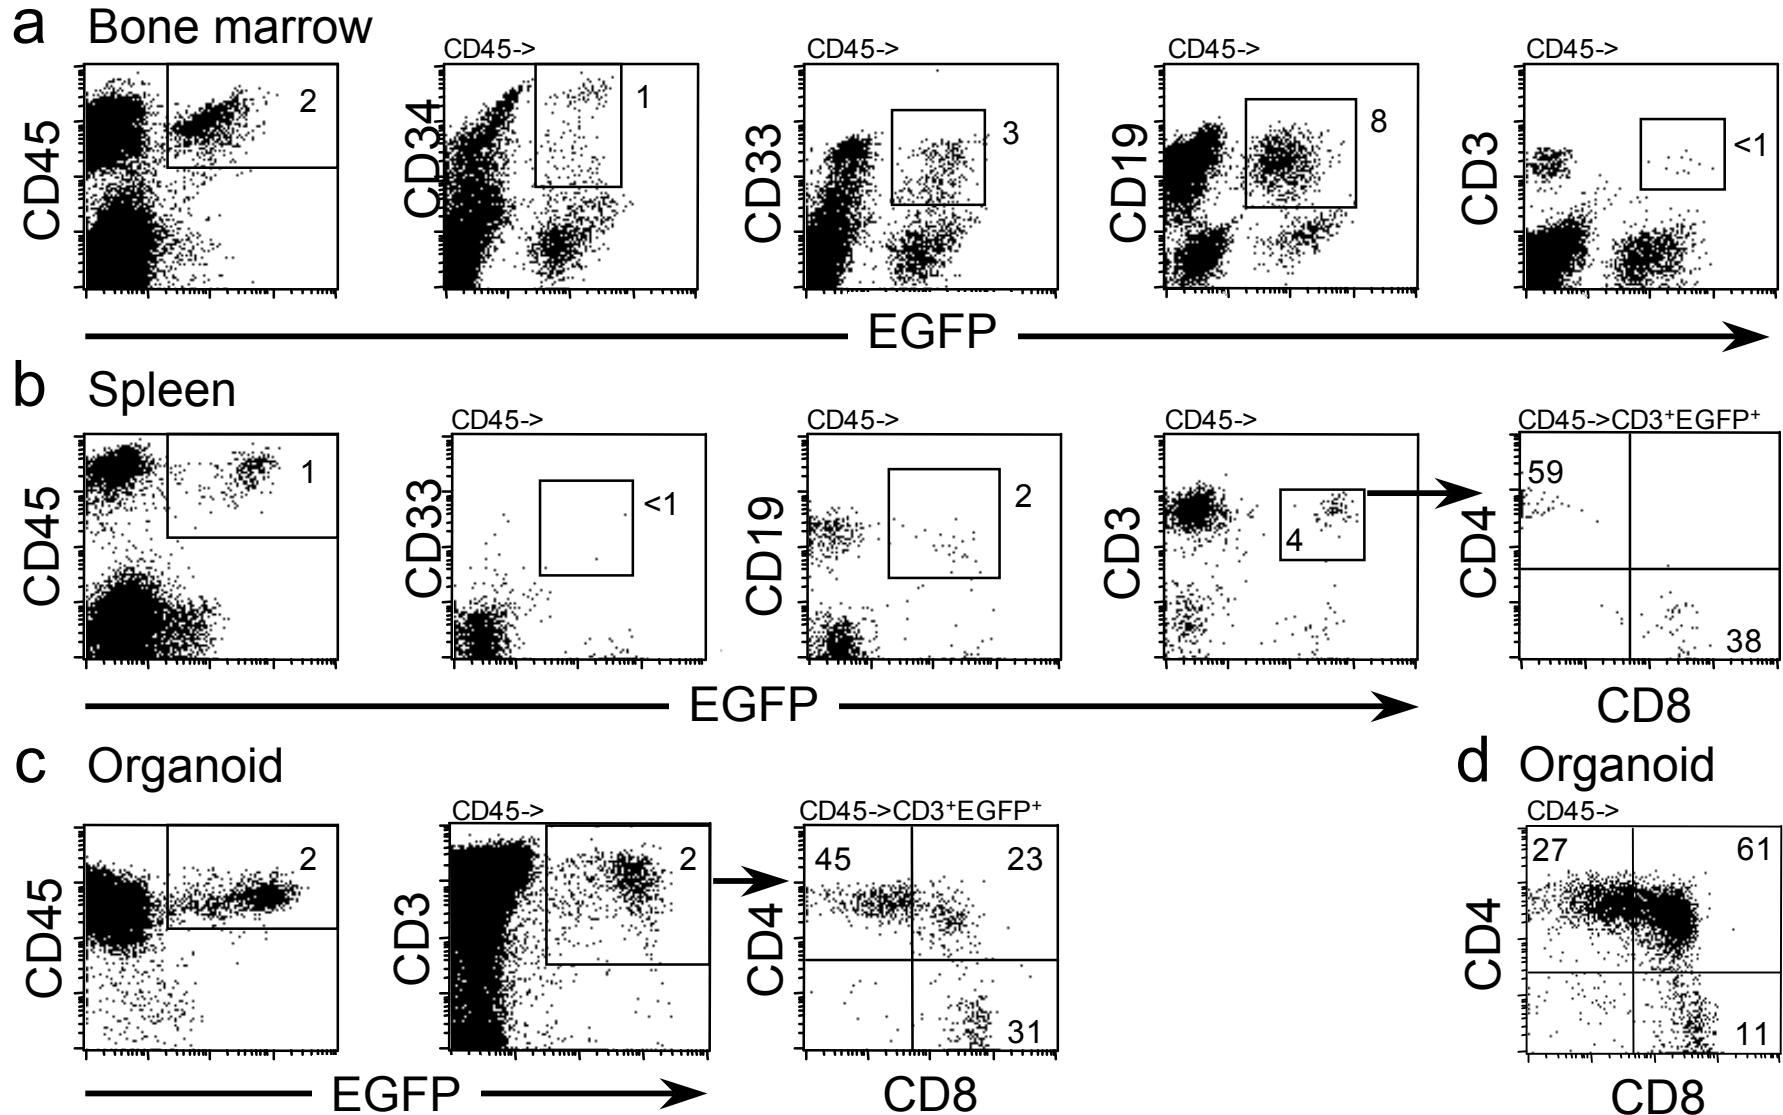

**Supplementary Figure 2.** Analysis of EGFP expression in different hematopoietic cell subsets after transplantation with CD34<sup>+</sup> cells transduced with a lentivirus-based vector. Mice implanted with human fetal thymic and liver tissue transplanted with autologous CD34<sup>+</sup> cells transduced with a lentivirus-based vector expressing EGFP. Mononuclear cells were harvested 12 weeks post transplant. Analysis shows EGFP expression in (a) bone marrow, (b) spleen and (c) thymic organoid. Panel (d) depicts total human CD4/CD8 cells in the same thymic organoid.
