# Supplementary material for: Humanized mice mount specific adaptive and innate immune responses to EBV and TSST-1
Source: Springer Nature journal article supplement (doi:10.1038/nm1431), 2006-10-22
Supplement: 41591_2006_BFnm1431_MOESM3_ESM.pdf [file 41591_2006_BFnm1431_MOESM3_ESM.pdf]

## Supplementary Figure 3

### a BLT lymph node

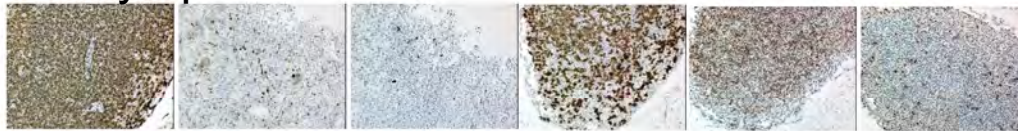

CD45 CD68 CD83 CD20 CD4 CD8

### Human lymph node

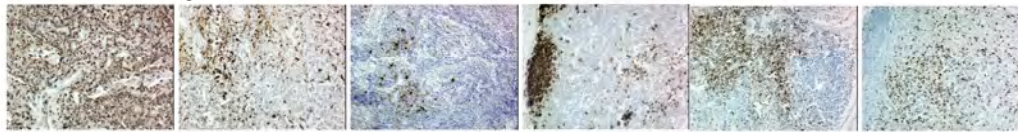

CD45 CD68 CD83 CD20 CD4 CD8

### b BLT lymph node

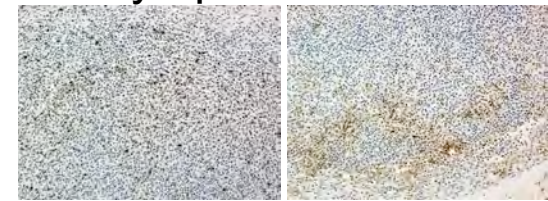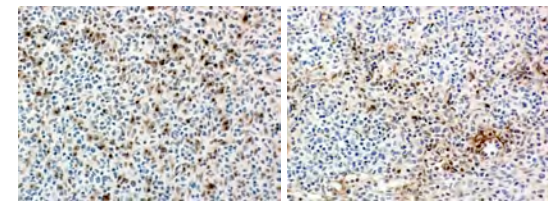

CXCL13 CCL21

### c BLT lymph node

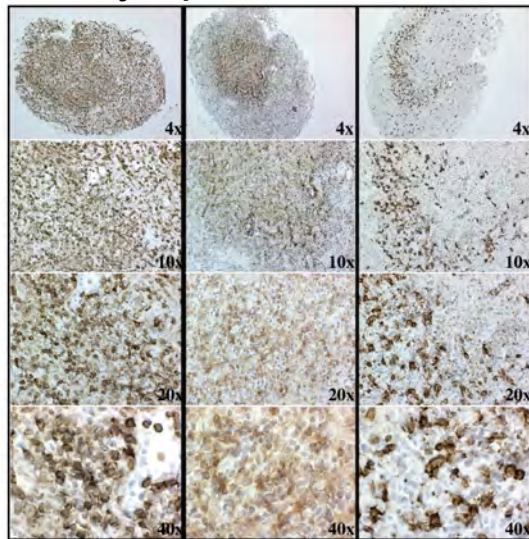

CD45 CD4 CD20

### d BLT spleen

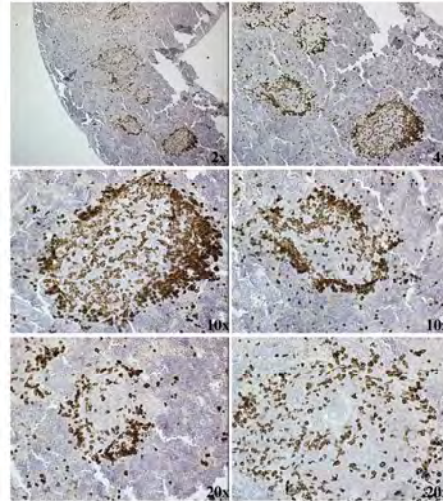

CD20 CD20

### Supplementary Figure 3.

Immunohistological analysis of secondary lymphoid tissues of BLT mice. **a)** Immunohistological staining comparing the human reconstitution of BLT mouse lymph node to human lymph node tissue controls (100x). **b)** Immunohistological staining of BLT lymph node for human CXCL13 and CCL21 (100x top and 200x bottom). **c)** BLT mice were administered sheep red blood cells to induce germinal center formation and lymphoid tissues were analyzed by immunohistochemistry 5 days later. BLT mouse lymph nodes stained with anti-human CD45, CD4 and CD20 showed organization of T and B cells into discrete cellular compartments reminiscent of B and T cell zones. **d)** BLT spleens develop distinct germinal center-like structures.
