# Supplementary material for: Humanized mice mount specific adaptive and innate immune responses to EBV and TSST-1
Source: Springer Nature journal article supplement (doi:10.1038/nm1431), 2006-10-22
Supplement: 41591_2006_BFnm1431_MOESM4_ESM.pdf [file 41591_2006_BFnm1431_MOESM4_ESM.pdf]

## Supplementary Figure 4

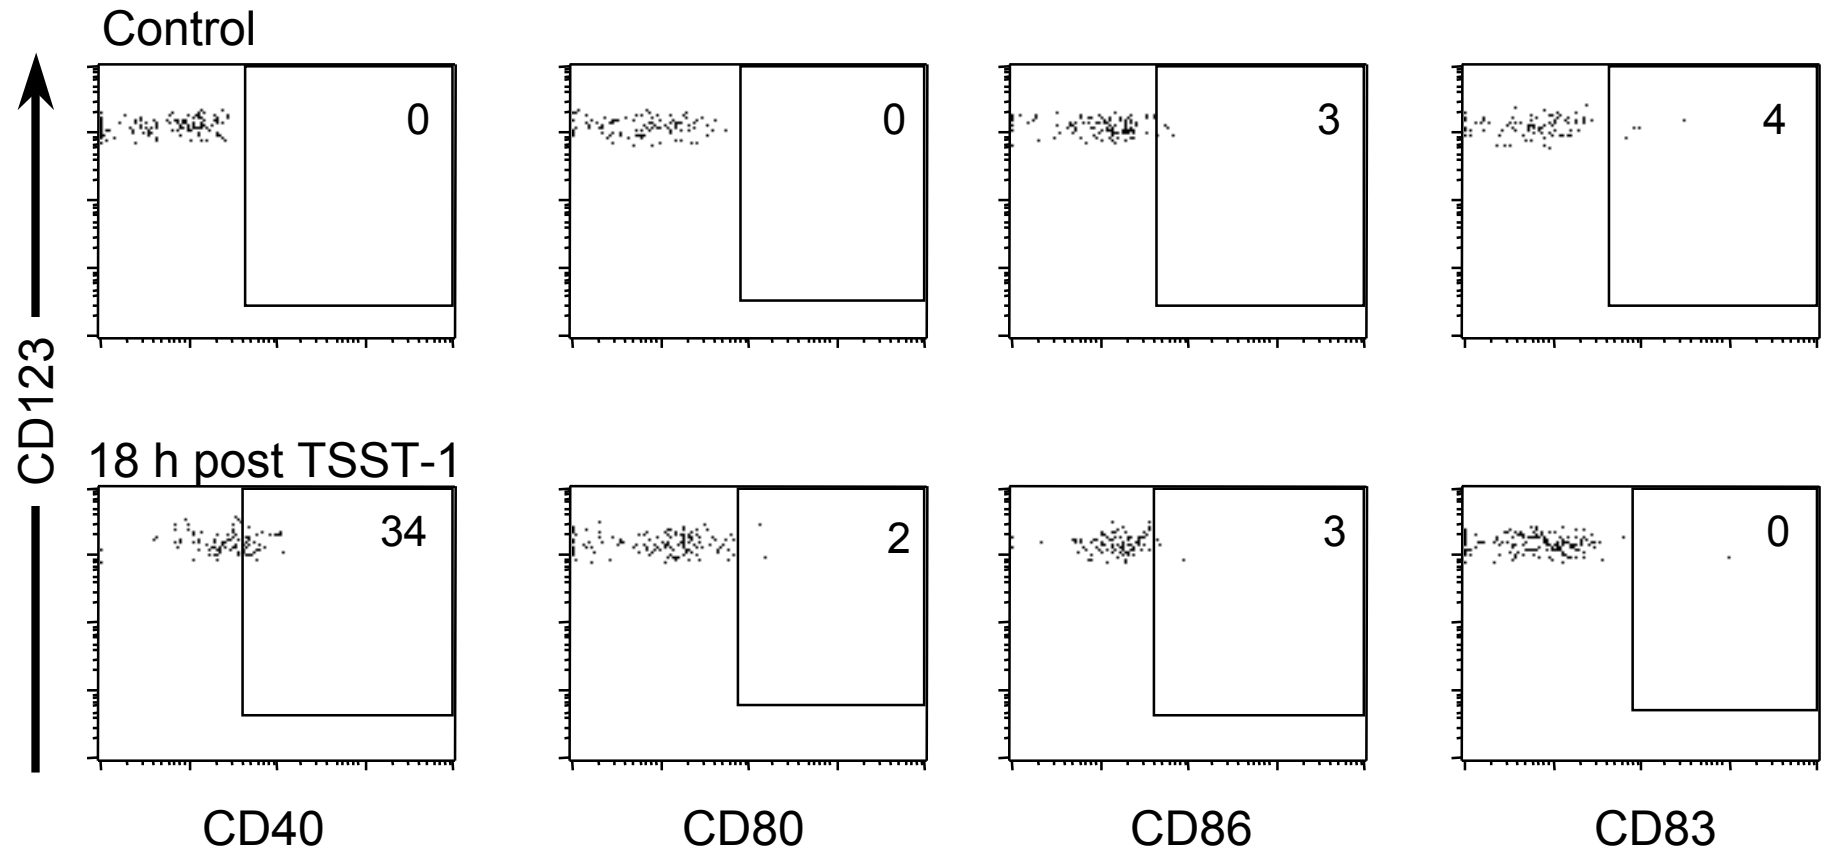

**Supplementary Figure 4.** Spleen CD123<sup>+</sup> human DC do not respond to TSST-1. Human CD123<sup>+</sup> DC in the spleen of BLT mice were analyzed by gating lineage negative, HLA DR<sup>++</sup> and CD123<sup>+</sup> cells for expression of activation (CD40, CD80 and CD86) and maturation (CD83) markers before (top) and after TSST-1 injection (bottom). CD123<sup>+</sup> DC were not activated and did not mature in response to TSST-1.
