# Supplementary material for: Humanized mice mount specific adaptive and innate immune responses to EBV and TSST-1
Source: Springer Nature journal article supplement (doi:10.1038/nm1431), 2006-10-22
Supplement: 41591_2006_BFnm1431_MOESM5_ESM.pdf [file 41591_2006_BFnm1431_MOESM5_ESM.pdf]

## Supplementary Table 1

Analysis of human CD4<sup>+</sup> and CD8<sup>+</sup> T cells in different tissues from BLT mice.

| BLT T cells                                                                                                                                                  | Human T cells                                                                                                                                           |
|--------------------------------------------------------------------------------------------------------------------------------------------------------------|---------------------------------------------------------------------------------------------------------------------------------------------------------|
| <u>† Peripheral Blood</u> ( <i>n</i> = 18)<br>CD3 <sup>+</sup> CD4 <sup>+</sup> 71.9 ± 11.8 (52-88)<br>CD3 <sup>+</sup> CD8 <sup>+</sup> 23.8 ± 10.9 (11-42) | <u>Peripheral Blood</u> ( <i>n</i> = 5)<br>CD3 <sup>+</sup> CD4 <sup>+</sup> 75.4 ± 9.7 (62-86)<br>CD3 <sup>+</sup> CD8 <sup>+</sup> 23.0 ± 9.7 (14-38) |
| <u>BM</u> ( <i>n</i> = 12)<br>CD3 <sup>+</sup> CD4 <sup>+</sup> 66 ± 7.5 (52-81)<br>CD3 <sup>+</sup> CD8 <sup>+</sup> 26 ± 8.2 (13-43)                       |                                                                                                                                                         |
| <u>Spleen</u> ( <i>n</i> = 15)<br>CD3 <sup>+</sup> CD4 <sup>+</sup> 67.6 ± 10.3 (48-81)<br>CD3 <sup>+</sup> CD8 <sup>+</sup> 22.3 ± 9.5 (11-46)              |                                                                                                                                                         |
| <u>LN</u> ( <i>n</i> = 12)<br>CD3 <sup>+</sup> CD4 <sup>+</sup> 78.1 ± 7.4 (64-91)<br>CD3 <sup>+</sup> CD8 <sup>+</sup> 15.3 ± 7.4 (8-30)                    |                                                                                                                                                         |
| <u>Lung</u> ( <i>n</i> = 10)<br>CD3 <sup>+</sup> CD4 <sup>+</sup> 68.7 ± 12.8 (47-87)<br>CD3 <sup>+</sup> CD8 <sup>+</sup> 17.7 ± 13.2 (4-48)                |                                                                                                                                                         |
| <u>Liver</u> ( <i>n</i> = 6)<br>CD3 <sup>+</sup> CD4 <sup>+</sup> 75.7 ± 12.9 (60-91)<br>CD3 <sup>+</sup> CD8 <sup>+</sup> 20.3 ± 13.2 (7-40)                |                                                                                                                                                         |

† Mean percentage of CD4<sup>+</sup> and CD8<sup>+</sup> human T cells with S.D. and ranges.

*P* = 0.28 for comparison of CD4<sup>+</sup> peripheral blood T cells of BLT mice to healthy human controls.

*P* = 0.44 for comparison of CD8<sup>+</sup> peripheral blood T cells of BLT mice to healthy human controls

No significant differences were observed based on a single tailed Student t test comparing BLT to human PB T cells.
