# Supplementary material for: Humanized mice mount specific adaptive and innate immune responses to EBV and TSST-1
Source: Springer Nature journal article supplement (doi:10.1038/nm1431), 2006-10-22
Supplement: 41591_2006_BFnm1431_MOESM6_ESM.pdf [file 41591_2006_BFnm1431_MOESM6_ESM.pdf]

## Supplementary Table 2

Naïve versus memory phenotype of human peripheral blood T cells in BLT mice.

| <u>† BLT peripheral blood</u>                                            |                                                                           | <u>Human peripheral blood</u>                                            |                                                                           |
|--------------------------------------------------------------------------|---------------------------------------------------------------------------|--------------------------------------------------------------------------|---------------------------------------------------------------------------|
| Naïve T cells<br>%CD3 <sup>+</sup> CD45RA <sup>+</sup> CD27 <sup>+</sup> | Memory T cells<br>%CD3 <sup>+</sup> CD45RA <sup>-</sup> CD27 <sup>+</sup> | Naïve T cells<br>%CD3 <sup>+</sup> CD45RA <sup>+</sup> CD27 <sup>+</sup> | Memory T cells<br>%CD3 <sup>+</sup> CD45RA <sup>-</sup> CD27 <sup>+</sup> |
| 78.0                                                                     | 21.0                                                                      | 42.0                                                                     | 50.0                                                                      |
| 87.0                                                                     | 13.0                                                                      | 22.0                                                                     | 41.0                                                                      |
| 67.0                                                                     | 32.0                                                                      | 50.0                                                                     | 34.0                                                                      |
| 80.0                                                                     | 20.0                                                                      | 43.0                                                                     | 54.0                                                                      |
| 53.0                                                                     | 38.0                                                                      | 37.0                                                                     | 52.0                                                                      |
| 40.0                                                                     | 56.0                                                                      |                                                                          |                                                                           |
| 60.0                                                                     | 34.0                                                                      |                                                                          |                                                                           |
| 64.0                                                                     | 13.0                                                                      |                                                                          |                                                                           |
| 40.0                                                                     | 51.0                                                                      |                                                                          |                                                                           |
| 50.0                                                                     | 45.0                                                                      |                                                                          |                                                                           |
| 65.0                                                                     | 33.0                                                                      |                                                                          |                                                                           |
| <b>62.2 ± 15.6</b>                                                       | <b>32.4 ± 14.6</b>                                                        | <b>38.8 ± 10.5**</b>                                                     | <b>46.2 ± 8.4*</b>                                                        |

† Mean values for each T cell population are indicated with the S.D.. (Memory effector and resting memory T cell percentages not included)

Significant differences of T cell phenotypes determined using a single tailed Student t test are indicated with asterisks.

\*\*  $P = 0.005$  for comparison of naïve T cells of BLT mice to normal human donors.

\*  $P = 0.035$  for comparison of memory T cells of BLT mice to normal human donors.
